# Supplementary material for: A Transcriptomic Response to Lactiplantibacillus plantarum-KCC48 against High-Fat Diet-Induced Fatty Liver Diseases in Mice
Source: MDPI journal article supplement (doi:10.3390/ijms23126750), 2022-06-17
Supplement: s1 [file s1]

## **A Transcriptomic Response to *Lactiplantibacillus plantarum*-KCC48 against High-Fat Diet-Induced Fatty Liver Diseases in Mice**

**Ilavenil Soundharrajan <sup>1</sup>, Muthusamy Karnan <sup>1</sup>, Jeong-Sung Jung <sup>1</sup>, Kyung-Dong Lee <sup>2</sup>,  
Jeong-Chae Lee <sup>3</sup>, Thiyagarajan Ramesh <sup>4</sup>, Dahye Kim <sup>5,\*</sup> and Ki-Choon Choi <sup>1,\*</sup>**

<sup>1</sup> Grassland and Forage Division, Rural Development Administration, National Institute of Animal Science, Cheonan 31000, Korea; ilavenil@korea.kr (I.S.); karnan7899@rediffmail.com (M.K.); jjs3873@korea.kr (J.-S.J.)

<sup>2</sup> Department of Companion Animals, Dongsin University, Naju 58245, Korea; leekd@dsu.ac.kr

<sup>3</sup> Department of Bioactive Material Sciences and Research Center of Bioactive Materials, Jeonbuk National University, Jeonju 54896, Korea; leejc88@jbnu.ac.kr

<sup>4</sup> Department of Basic Medical Sciences, College of Medicine, Prince Sattam Bin Abdulaziz University, Al-Kharj 11942, Saudi Arabia; thiyagaramesh@gmail.com

<sup>5</sup> Animal Genomics and Bioinformatics Division, National Institute of Animal Science, Wanju 55365, Korea

\* Correspondence: dhkim0724@korea.kr (D.K.); choiwh@korea.kr (K.-C.C.); Tel.: +82-41-580-6752 (D.K.); Fax: +82-41-580-6779 (K.-C.C.)

Table S1. Differentially expressed genes in the livers of HFD-fed animals compared with controls

| S. No | Gene Symbol   | Gene Name                                                                                                   | Fold Changes | P value |
|-------|---------------|-------------------------------------------------------------------------------------------------------------|--------------|---------|
| 1     | 1810008I18Rik | RIKEN cDNA 1810008I18 gene(1810008I18Rik)                                                                   | 0.445        | 0.00005 |
| 2     | 9030619P08Rik | lymphocyte antigen 6 complex pseudogene(9030619P08Rik)                                                      | 2.094        | 0.00005 |
| 3     | Abcc3         | ATP-binding cassette, sub-family C (CFTR/MRP), member 3(Abcc3)                                              | 3.739        | 0.00005 |
| 4     | Acaa1b        | acetyl-Coenzyme A acyltransferase 1B(Acaa1b)                                                                | 2.846        | 0.00005 |
| 5     | Acadm         | acyl-Coenzyme A dehydrogenase, medium chain(Acadm)                                                          | 2.081        | 0.00005 |
| 6     | Ady           | ATP citrate lyase(Ady)                                                                                      | 0.349        | 0.00005 |
| 7     | Acmsd         | amino carboxymuconate semialdehyde decarboxylase(Acmsd)                                                     | 0.442        | 0.00005 |
| 8     | Acnat2        | acyl-coenzyme A amino acid N-acyltransferase 2(Acnat2)                                                      | 2.775        | 0.00005 |
| 9     | Acot1         | acyl-CoA thioesterase 1(Acot1)                                                                              | 5.142        | 0.00005 |
| 10    | Acss2         | acyl-CoA synthetase short-chain family member 2(Acss2)                                                      | 0.484        | 0.00005 |
| 11    | Acss3         | acyl-CoA synthetase short-chain family member 3(Acss3)                                                      | 4.278        | 0.00005 |
| 12    | Adam11        | a disintegrin and metallopeptidase domain 11(Adam11)                                                        | 2.318        | 0.00005 |
| 13    | Adhfe1        | alcohol dehydrogenase, iron containing, 1(Adhfe1)                                                           | 2.557        | 0.00005 |
| 14    | Aldh1a1       | aldehyde dehydrogenase family 1, subfamily A1(Aldh1a1)                                                      | 2.539        | 0.00005 |
| 15    | Aldh3a2       | aldehyde dehydrogenase family 3, subfamily A2(Aldh3a2)                                                      | 6.414        | 0.00005 |
| 16    | Ang           | angiogenin, ribonuclease, RNase A family, 5(Ang)                                                            | 0.498        | 0.04865 |
| 17    | Angptl4       | angiopoietin-like 4(Angptl4)                                                                                | 2.147        | 0.00005 |
| 18    | Anxa2         | annexin A2(Anxa2)                                                                                           | 2.888        | 0.00005 |
| 19    | Apol9a        | apolipoprotein L 9a(Apol9a)                                                                                 | 2.532        | 0.00005 |
| 20    | Apol9b        | apolipoprotein L 9b(Apol9b)                                                                                 | 2.080        | 0.00005 |
| 21    | Apom          | apolipoprotein M(Apom)                                                                                      | 0.465        | 0.00005 |
| 22    | Arntl         | aryl hydrocarbon receptor nuclear translocator-like(Arntl)                                                  | 0.477        | 0.00005 |
| 23    | Arrdc3        | arrestin domain containing 3(Arrdc3)                                                                        | 2.038        | 0.00005 |
| 24    | Avpr1a        | arginine vasopressin receptor 1A(Avpr1a)                                                                    | 0.454        | 0.00005 |
| 25    | Bche          | butyrylcholinesterase(Bche)                                                                                 | 2.055        | 0.00005 |
| 26    | Cd36          | CD36 antigen(Cd36)                                                                                          | 3.558        | 0.00005 |
| 27    | Cd74          | CD74 antigen (invariant polypeptide of major histocompatibility complex, class II antigen-associated)(Cd74) | 2.053        | 0.00005 |
| 28    | Cdh1          | cadherin 1(Cdh1)                                                                                            | 0.242        | 0.00005 |
| 29    | Ces1g         | carboxylesterase 1G(Ces1g)                                                                                  | 2.228        | 0.00005 |
| 30    | Ces2a         | carboxylesterase 2A(Ces2a)                                                                                  | 0.290        | 0.00005 |
| 31    | Chka          | choline kinase alpha(Chka)                                                                                  | 0.400        | 0.00005 |
| 32    | Cry1          | cryptochrome 1 (photolyase-like)(Cry1)                                                                      | 0.438        | 0.00005 |
| 33    | Ctse          | cathepsin E(Ctse)                                                                                           | 3.918        | 0.00005 |
| 34    | Cyp2a12       | cytochrome P450, family 2, subfamily a, polypeptide 12(Cyp2a12)                                             | 0.427        | 0.00005 |
| 35    | Cyp2b9        | cytochrome P450, family 2, subfamily b, polypeptide 9(Cyp2b9)                                               | 13.813       | 0.00005 |
| 36    | Cyp2c37       | cytochrome P450, family 2, subfamily c, polypeptide 37(Cyp2c37)                                             | 3.299        | 0.00005 |
| 37    | Cyp2c38       | cytochrome P450, family 2, subfamily c, polypeptide 38(Cyp2c38)                                             | 6.591        | 0.00005 |
| 38    | Cyp2c39       | cytochrome P450, family 2, subfamily c, polypeptide 39(Cyp2c39)                                             | 9.718        | 0.00005 |
| 39    | Cyp2c44       | cytochrome P450, family 2, subfamily c, polypeptide 44(Cyp2c44)                                             | 2.282        | 0.00005 |
| 40    | Cyp2c50       | cytochrome P450, family 2, subfamily c, polypeptide 50(Cyp2c50)                                             | 2.790        | 0.00005 |
| 41    | Cyp2c54       | cytochrome P450, family 2, subfamily c, polypeptide 54(Cyp2c54)                                             | 3.351        | 0.00005 |
| 42    | Cyp3a11       | cytochrome P450, family 3, subfamily a, polypeptide 11(Cyp3a11)                                             | 5.499        | 0.00005 |
| 43    | Cyp3a59       | cytochrome P450, family 3, subfamily a, polypeptide 59(Cyp3a59)                                             | 4.626        | 0.00005 |
| 44    | Cyp4a1        | cytochrome P450, family 46, subfamily a, polypeptide 1(Cyp4a1)                                              | 2.026        | 0.00005 |
| 45    | Cyp4a10       | cytochrome P450, family 4, subfamily a, polypeptide 10(Cyp4a10)                                             | 26.691       | 0.00005 |
| 46    | Cyp4a12b      | cytochrome P450, family 4, subfamily a, polypeptide 12B(Cyp4a12b)                                           | 2.282        | 0.00005 |
| 47    | Cyp4a14       | cytochrome P450, family 4, subfamily a, polypeptide 14(Cyp4a14)                                             | 24.394       | 0.0001  |
| 48    | Cyp51         | cytochrome P450, family 51(Cyp51)                                                                           | 0.454        | 0.00005 |
| 49    | Cyp7a1        | cytochrome P450, family 7, subfamily a, polypeptide 1(Cyp7a1)                                               | 4.482        | 0.00005 |
| 50    | Dbp           | D site albumin promoter binding protein(Dbp)                                                                | 13.345       | 0.0429  |

|     |          |                                                                                        |        |         |
|-----|----------|----------------------------------------------------------------------------------------|--------|---------|
| 51  | Ddah1    | dimethylarginine dimethylaminohydrolase 1(Ddah1)                                       | 2.251  | 0.00005 |
| 52  | Derl3    | Der1-like domain family, member 3(Derl3)                                               | 3.311  | 0.00005 |
| 53  | Dhcr7    | 7-dehydrocholesterol reductase(Dhcr7)                                                  | 0.454  | 0.00005 |
| 54  | Dio1     | deiodinase, iodothyronine, type I(Dio1)                                                | 3.168  | 0.00005 |
| 55  | Dmbt1    | deleted in malignant brain tumors 1(Dmbt1)                                             | 47.186 | 0.00005 |
| 56  | Ehhadh   | enoyl-Coenzyme A, hydratase/3-hydroxyacyl Coenzyme A dehydrogenase(Ehhadh)             | 2.223  | 0.00005 |
| 57  | Elov13   | elongation of very long chain fatty acids (FEN1/Elo2, SUR4/Elo3, yeast)-like 3(Elov13) | 0.271  | 0.00005 |
| 58  | Ephx1    | epoxide hydrolase 1, microsomal(Ephx1)                                                 | 2.992  | 0.00005 |
| 59  | Fabp2    | fatty acid binding protein 2, intestinal(Fabp2)                                        | 2.224  | 0.00005 |
| 60  | Fabp4    | fatty acid binding protein 4, adipocyte(Fabp4)                                         | 2.079  | 0.00005 |
| 61  | Fabp5    | fatty acid binding protein 5, epidermal(Fabp5)                                         | 0.076  | 0.00005 |
| 62  | Fam198a  | family with sequence similarity 198, member A(Fam198a)                                 | 0.482  | 0.00005 |
| 63  | Fam25c   | family with sequence similarity 25, member C(Fam25c)                                   | 0.168  | 0.00005 |
| 64  | Fasn     | fatty acid synthase(Fasn)                                                              | 0.354  | 0.00005 |
| 65  | Fdps     | farnesyl diphosphate synthetase(Fdps)                                                  | 0.346  | 0.00005 |
| 66  | Fgl1     | fibrinogen-like protein 1(Fgl1)                                                        | 0.470  | 0.00005 |
| 67  | Fitm1    | fat storage-inducing transmembrane protein 1(Fitm1)                                    | 5.975  | 0.00005 |
| 68  | Fkbp5    | FK506 binding protein 5(Fkbp5)                                                         | 2.865  | 0.00005 |
| 69  | Gadd45g  | growth arrest and DNA-damage-inducible 45 gamma(Gadd45g)                               | 0.267  | 0.00005 |
| 70  | Gas6     | growth arrest specific 6(Gas6)                                                         | 2.145  | 0.00005 |
| 71  | Gm11127  | predicted gene 11127(Gm11127)                                                          | 2.441  | 0.00005 |
| 72  | Gm3219   | B-cell CLL/lymphoma 7C pseudogene(Gm3219)                                              | 0.401  | 0.00005 |
| 73  | Gm6644   | Akr1b3 pseudogene(Gm6644)                                                              | 0.492  | 0.00005 |
| 74  | Gpc1     | glypican 1(Gpc1)                                                                       | 2.999  | 0.00005 |
| 75  | Gstm2    | glutathione S-transferase, mu 2(Gstm2)                                                 | 2.275  | 0.00005 |
| 76  | Gstm3    | glutathione S-transferase, mu 3(Gstm3)                                                 | 3.361  | 0.00005 |
| 77  | H2-Aa    | histocompatibility 2, class II antigen A, alpha(H2-Aa)                                 | 2.585  | 0.00005 |
| 78  | H2-Ab1   | histocompatibility 2, class II antigen A, beta 1(H2-Ab1)                               | 2.325  | 0.00005 |
| 79  | H2-Eb1   | histocompatibility 2, class II antigen E beta(H2-Eb1)                                  | 3.240  | 0.00005 |
| 80  | H2-Q5    | histocompatibility 2, Q region locus 5(H2-Q5)                                          | 0.441  | 0.00005 |
| 81  | Hes6     | hairy and enhancer of split 6(Hes6)                                                    | 0.459  | 0.00005 |
| 82  | Hexb     | hexosaminidase B(Hexb)                                                                 | 2.459  | 0.004   |
| 83  | Hpgd     | hydroxyprostaglandin dehydrogenase 15 (NAD)(Hpgd)                                      | 2.304  | 0.00005 |
| 84  | Hsd17b11 | hydroxysteroid (17-beta) dehydrogenase 11(Hsd17b11)                                    | 2.025  | 0.00005 |
| 85  | Idi1     | isopentenyl-diphosphate delta isomerase(Idi1)                                          | 0.351  | 0.00005 |
| 86  | Igfbp2   | insulin-like growth factor binding protein 2(Igfbp2)                                   | 0.483  | 0.00005 |
| 87  | Inhba    | inhibin beta-A(Inhba)                                                                  | 0.465  | 0.00005 |
| 88  | Insig1   | insulin induced gene 1(Insig1)                                                         | 0.433  | 0.00005 |
| 89  | Irs2     | insulin receptor substrate 2(Irs2)                                                     | 0.465  | 0.00005 |
| 90  | Krt19    | keratin 19(Krt19)                                                                      | 4.125  | 0.00005 |
| 91  | Lcn2     | lipocalin 2(Lcn2)                                                                      | 3.362  | 0.00005 |
| 92  | Lpin1    | lipin 1(Lpin1)                                                                         | 2.546  | 0.00005 |
| 93  | Ly6a     | lymphocyte antigen 6 complex, locus A(Ly6a)                                            | 8.768  | 0.00005 |
| 94  | Ly6c1    | lymphocyte antigen 6 complex, locus C1(Ly6c1)                                          | 8.054  | 0.00005 |
| 95  | Ly6d     | lymphocyte antigen 6 complex, locus D(Ly6d)                                            | 5.567  | 0.00005 |
| 96  | Mfsd2a   | major facilitator superfamily domain containing 2A(Mfsd2a)                             | 4.328  | 0.00005 |
| 97  | Mme      | membrane metallo endopeptidase(Mme)                                                    | 2.384  | 0.00005 |
| 98  | Moxd1    | monooxygenase, DBH-like 1(Moxd1)                                                       | 0.020  | 0.00005 |
| 99  | Mt2      | metallothionein 2(Mt2)                                                                 | 2.602  | 0.00005 |
| 100 | Mthfr    | 5,10-methylenetetrahydrofolate reductase(Mthfr)                                        | 0.401  | 0.00005 |
| 101 | Mup21    | major urinary protein 21(Mup21)                                                        | 0.456  | 0.00005 |
| 102 | Mvd      | mevalonate (diphospho) decarboxylase(Mvd)                                              | 0.387  | 0.00005 |
| 103 | Myl9     | myosin, light polypeptide 9, regulatory(Myl9)                                          | 2.474  | 0.00005 |
| 104 | Nfil3    | nuclear factor, interleukin 3, regulated(Nfil3)                                        | 0.482  | 0.00005 |
| 105 | Nlrp12   | NLR family, pyrin domain containing 12(Nlrp12)                                         | 2.060  | 0.00005 |
| 106 | Nr1d1    | nuclear receptor subfamily 1, group D, member 1(Nr1d1)                                 | 3.334  | 0.00005 |

|     |          |                                                                                |       |         |
|-----|----------|--------------------------------------------------------------------------------|-------|---------|
| 107 | Nr1d2    | nuclear receptor subfamily 1, group D, member 2(Nr1d2)                         | 2.745 | 0.00005 |
| 108 | Nsdhl    | NAD(P) dependent steroid dehydrogenase-like(Nsdhl)                             | 0.458 | 0.00005 |
| 109 | Obp2a    | odorant binding protein 2A(Obp2a)                                              | 7.848 | 0.00005 |
| 110 | Omd      | osteomodulin(Omd)                                                              | 2.364 | 0.00005 |
| 111 | Orm2     | orosomucoid 2(Orm2)                                                            | 2.307 | 0.00005 |
| 112 | Osgin1   | oxidative stress induced growth inhibitor 1(Osgin1)                            | 0.448 | 0.00005 |
| 113 | Pcsk9    | proprotein convertase subtilisin/kexin type 9(Pcsk9)                           | 0.343 | 0.00005 |
| 114 | Pctp     | phosphatidylcholine transfer protein(Pctp)                                     | 2.636 | 0.00005 |
| 115 | Pmvk     | phosphomevalonate kinase(Pmvk)                                                 | 0.342 | 0.00005 |
| 116 | Por      | P450 (cytochrome) oxidoreductase(Por)                                          | 3.068 | 0.00005 |
| 117 | Ppard    | peroxisome proliferator activator receptor delta(Ppard)                        | 0.226 | 0.00005 |
| 118 | Rad51b   | RAD51 paralog B(Rad51b)                                                        | 3.079 | 0.00005 |
| 119 | Rapgef4  | Rap guanine nucleotide exchange factor (GEF) 4(Rapgef4)                        | 2.154 | 0.00005 |
| 120 | Rdh11    | retinol dehydrogenase 11(Rdh11)                                                | 0.369 | 0.00005 |
| 121 | Rdh16    | retinol dehydrogenase 16(Rdh16)                                                | 3.376 | 0.00005 |
| 122 | Rdh9     | retinol dehydrogenase 9(Rdh9)                                                  | 3.309 | 0.00005 |
| 123 | Rec114   | REC114 meiotic recombination protein(Rec114)                                   | 2.086 | 0.03665 |
| 124 | Retsat   | retinol saturase (all trans retinol 13,14 reductase)(Retsat)                   | 2.056 | 0.00005 |
| 125 | Rgs16    | regulator of G-protein signaling 16(Rgs16)                                     | 4.933 | 0.00005 |
| 126 | Rmrp     | RNA component of mitochondrial RNAase P(Rmrp)                                  | 0.281 | 0.00005 |
| 127 | Rpph1    | ribonuclease P RNA component H1(Rpph1)                                         | 0.246 | 0.00005 |
| 128 | Rprl3    | ribonuclease P RNA-like 3(Rprl3)                                               | 0.301 | 0.00085 |
| 129 | Rtn4     | reticulon 4(Rtn4)                                                              | 2.115 | 0.00005 |
| 130 | Saa3     | serum amyloid A 3(Saa3)                                                        | 3.576 | 0.00005 |
| 131 | Sh3bgrl2 | SH3 domain binding glutamic acid-rich protein like 2(Sh3bgrl2)                 | 2.345 | 0.00005 |
| 132 | Slc16a7  | solute carrier family 16 (monocarboxylic acid transporters), member 7(Slc16a7) | 2.132 | 0.00005 |
| 133 | Slco2a1  | solute carrier organic anion transporter family, member 2a1(Slco2a1)           | 0.459 | 0.00005 |
| 134 | Snord104 | small nucleolar RNA, C/D box 104(Snord104)                                     | 0.000 | 0.0001  |
| 135 | Tagln    | transgelin(Tagln)                                                              | 2.419 | 0.01895 |
| 136 | Tceal8   | transcription elongation factor A (SII)-like 8(Tceal8)                         | 2.259 | 0.00005 |
| 137 | Tef      | thyrotroph embryonic factor(Tef)                                               | 3.055 | 0.00005 |
| 138 | Tff3     | trefoil factor 3, intestinal(Tff3)                                             | 0.135 | 0.0061  |
| 139 | Tm4sf4   | transmembrane 4 superfamily member 4(Tm4sf4)                                   | 2.699 | 0.00005 |
| 140 | Tppp     | tubulin polymerization promoting protein(Tppp)                                 | 2.242 | 0.00005 |
| 141 | Tsku     | tsukushi, small leucine rich proteoglycan(Tsku)                                | 3.061 | 0.00005 |
| 142 | Tstd1    | thiosulfate sulfurtransferase (rhodanese)-like domain containing 1(Tstd1)      | 0.499 | 0.00005 |
| 143 | Ugt1a1   | UDP glucuronosyltransferase 1 family, polypeptide A1(Ugt1a1)                   | 2.205 | 0.01135 |
| 144 | Upp2     | uridine phosphorylase 2(Upp2)                                                  | 5.374 | 0.00005 |
| 145 | Vnn3     | vanin 3(Vnn3)                                                                  | 2.523 | 0.00005 |

Table S2. Differences in liver gene expression in animals fed HFLPD compared to HFD alone

| S. No | Gene Symbol   | Gene Name                                                                              | Fold Changes | P value |
|-------|---------------|----------------------------------------------------------------------------------------|--------------|---------|
| 1     | 9030619P08Rik | lymphocyte antigen 6 complex pseudogene(9030619P08Rik)                                 | 0.493        | 0.00005 |
| 2     | Abcc3         | ATP-binding cassette, sub-family C (CFTR/MRP), member 3(Abcc3)                         | 0.373        | 0.00005 |
| 3     | Alas1         | aminolevulinic acid synthase 1(Alas1)                                                  | 0.460        | 0.00005 |
| 4     | Aldh3a2       | aldehyde dehydrogenase family 3, subfamily A2(Aldh3a2)                                 | 0.448        | 0.00005 |
| 5     | Avpr1a        | arginine vasopressin receptor 1A(Avpr1a)                                               | 2.216        | 0.00005 |
| 6     | BC002163      | NADH dehydrogenase Fe-S protein 5 pseudogene(BC002163)                                 | 10.423       | 0.04860 |
| 7     | Capn8         | calpain 8(Capn8)                                                                       | 2.402        | 0.00005 |
| 8     | Cck           | cholecystokinin(Cck)                                                                   | 2.269        | 0.00005 |
| 9     | Cd36          | CD36 antigen(Cd36)                                                                     | 0.375        | 0.00005 |
| 10    | Ces1g         | carboxylesterase 1G(Ces1g)                                                             | 0.356        | 0.00005 |
| 11    | Cml5          | Calmodulin-like protein 5                                                              | 2.544        | 0.00005 |
| 12    | Ctse          | cathepsin E(Ctse)                                                                      | 0.382        | 0.00005 |
| 13    | Cwc22         | CWC22 spliceosome-associated protein(Cwc22)                                            | 0.237        | 0.00005 |
| 14    | Cyp2a12       | cytochrome P450, family 2, subfamily a, polypeptide 12(Cyp2a12)                        | 2.902        | 0.00005 |
| 15    | Cyp2a5        | cytochrome P450, family 2, subfamily a, polypeptide 5(Cyp2a5)                          | 2.061        | 0.00005 |
| 16    | Cyp2b13       | cytochrome P450, family 2, subfamily b, polypeptide 13(Cyp2b13)                        | 0.201        | 0.00005 |
| 17    | Cyp2b9        | cytochrome P450, family 2, subfamily b, polypeptide 9(Cyp2b9)                          | 0.351        | 0.00005 |
| 18    | Cyp2c38       | cytochrome P450, family 2, subfamily c, polypeptide 38(Cyp2c38)                        | 0.273        | 0.00005 |
| 19    | Cyp2c39       | cytochrome P450, family 2, subfamily c, polypeptide 39(Cyp2c39)                        | 0.243        | 0.00005 |
| 20    | Cyp3a11       | cytochrome P450, family 3, subfamily a, polypeptide 11(Cyp3a11)                        | 0.460        | 0.00005 |
| 21    | Cyp3a59       | cytochrome P450, family 3, subfamily a, polypeptide 59(Cyp3a59)                        | 0.397        | 0.00005 |
| 22    | Cyp4a10       | cytochrome P450, family 4, subfamily a, polypeptide 10(Cyp4a10)                        | 0.186        | 0.00005 |
| 23    | Cyp4a12b      | cytochrome P450, family 4, subfamily a, polypeptide 12B(Cyp4a12b)                      | 0.456        | 0.00005 |
| 24    | Cyp4a14       | cytochrome P450, family 4, subfamily a, polypeptide 14(Cyp4a14)                        | 0.180        | 0.00005 |
| 25    | Cyp7a1        | cytochrome P450, family 7, subfamily a, polypeptide 1(Cyp7a1)                          | 0.454        | 0.00005 |
| 26    | Dbp           | D site albumin promoter binding protein(Db p)                                          | 0.355        | 0.04440 |
| 27    | Dmbt1         | deleted in malignant brain tumors 1(Dmbt1)                                             | 0.024        | 0.00005 |
| 28    | Elov13        | elongation of very long chain fatty acids (FEN1/Elo2, SUR4/Elo3, yeast)-like 3(Elov13) | 2.786        | 0.00005 |
| 29    | Fabp5         | fatty acid binding protein 5, epidermal(Fabp5)                                         | 2.275        | 0.00005 |
| 30    | Fam25c        | family with sequence similarity 25, member C(Fam25c)                                   | 9.567        | 0.00005 |
| 31    | Foxq1         | forkhead box Q1(Foxq1)                                                                 | 2.324        | 0.00005 |
| 32    | Gadd45g       | growth arrest and DNA-damage-inducible 45 gamma(Gadd45g)                               | 3.741        | 0.00005 |
| 33    | Gas6          | growth arrest specific 6(Gas6)                                                         | 0.455        | 0.00005 |
| 34    | Gm3219        | B-cell CLL/lymphoma 7C pseudogene(Gm3219)                                              | 3.253        | 0.00005 |
| 35    | Gstm2         | glutathione S-transferase, mu 2(Gstm2)                                                 | 0.430        | 0.00005 |
| 36    | Gstm3         | glutathione S-transferase, mu 3(Gstm3)                                                 | 0.249        | 0.00005 |
| 37    | H2-Eb1        | histocompatibility 2, class II antigen E beta(H2-Eb1)                                  | 0.361        | 0.00005 |
| 38    | Hopx          | HOP homeobox(Hopx)                                                                     | 2.103        | 0.00005 |
| 39    | Kcnk1         | potassium channel, subfamily K, member 1(Kcnk1)                                        | 2.314        | 0.00005 |
| 40    | Krt19         | keratin 19(Krt19)                                                                      | 0.287        | 0.00005 |
| 41    | Lpin1         | lipin 1(Lpin1)                                                                         | 0.403        | 0.00005 |
| 42    | Ly6a          | lymphocyte antigen 6 complex, locus A(Ly6a)                                            | 0.172        | 0.00005 |
| 43    | Ly6c1         | lymphocyte antigen 6 complex, locus C1(Ly6c1)                                          | 0.166        | 0.00005 |
| 44    | Ly6d          | lymphocyte antigen 6 complex, locus D(Ly6d)                                            | 0.463        | 0.00160 |
| 45    | Mfsd2a        | major facilitator superfamily domain containing 2A(Mfsd2a)                             | 0.352        | 0.00005 |
| 46    | Moxd1         | monooxygenase, DBH-like 1(Moxd1)                                                       | 31.917       | 0.00005 |
| 47    | Mup21         | major urinary protein 21(Mup21)                                                        | 2.180        | 0.00005 |
| 48    | My19          | myosin, light polypeptide 9, regulatory(My19)                                          | 0.405        | 0.00005 |
| 49    | Rdh16         | retinol dehydrogenase 16(Rdh16)                                                        | 0.283        | 0.00005 |
| 50    | Rdh9          | retinol dehydrogenase 9(Rdh9)                                                          | 0.350        | 0.00005 |
| 51    | Rnaset2b      | ribonuclease T2B(Rnaset2b)                                                             | 0.175        | 0.00005 |
| 52    | Saa3          | serum amyloid A 3(Saa3)                                                                | 0.448        | 0.00015 |
| 53    | Scd1          | stearoyl-Coenzyme A desaturase 1(Scd1)                                                 | 0.290        | 0.00005 |

|    |          |                                                                                                             |       |         |
|----|----------|-------------------------------------------------------------------------------------------------------------|-------|---------|
| 54 | Serpina7 | serine (or cysteine) peptidase inhibitor, clade A (alpha-1 antiproteinase, antitrypsin), member 7(Serpina7) | 0.465 | 0.00005 |
| 55 | Slc13a3  | solute carrier family 13 (sodium-dependent dicarboxylate transporter), member 3(Slc13a3)                    | 0.459 | 0.00005 |
| 56 | Slc16a7  | solute carrier family 16 (monocarboxylic acid transporters), member 7(Slc16a7)                              | 0.487 | 0.00005 |
| 57 | Snrnp25  | small nuclear ribonucleoprotein 25 (U11/U12)(Snrnp25)                                                       | 0.335 | 0.00005 |
| 58 | Sult1a1  | sulfotransferase family 1A, phenol-preferring, member 1(Sult1a1)                                            | 0.480 | 0.00005 |
| 59 | Tceal8   | transcription elongation factor A (SII)-like 8(Tceal8)                                                      | 0.420 | 0.00005 |
| 60 | Ubc      | ubiquitin C(Ubc)                                                                                            | 0.402 | 0.00005 |
| 61 | Upp2     | uridine phosphorylase 2(Upp2)                                                                               | 0.443 | 0.00005 |
| 62 | Nlrp12   | NLR family, pyrin domain containing 12                                                                      | 0.850 | 0.05117 |

Table S3. Compositions and Energy content of normal diet (AIN-93G) and High-fat diet (HFD45)

| Formulations       | AIN-93G  |             | HFD 45%cal |             |
|--------------------|----------|-------------|------------|-------------|
|                    | g        | kcal%       | g          | kcal%       |
| Protein            | 20       | 20          | 24         | 20          |
| Carbohydrate       | 64       | 64          | 41         | 35          |
| Fat                | 7        | 16          | 24         | 45          |
| kcal/kg            | 4,000    |             | 4,776      |             |
| <b>Ingredient</b>  | <b>g</b> | <b>kcal</b> | <b>g</b>   | <b>kcal</b> |
| Casein from milk   | 200      | 200         | 200        | 800         |
| Corn starch        | 397.486  | 1590        | 155.036    | 620         |
| Sucrose            | 100      | 400         | 50         | 200         |
| Dextrose           | 132      | 528         | 132        | 528         |
| Cellulose          | 50       | 0           | 50         | 0           |
| Soybean Oil        | 70       | 630         | 25         | 225         |
| Lard               | 0        | 0           | 175        | 1575        |
| Minerals mixture   | 35       | 0           | 35         | 0           |
| Vitamin mixture    | 10       | 40          | 10         | 40          |
| TBHQ*              | 0.014    | 0           | 0.014      | 0           |
| L-Cystine          | 3        | 15          | 3          | 12          |
| Choline Bitartrate | 2.5      | 0           | 2.5        | 0           |
